# Supplementary material for: Accumulation of di-2-ethylhexyl phthalate from polyvinyl chloride flooring into settled house dust and the effect on the bacterial community
Source: PeerJ journal article supplement (doi:10.7717/peerj.8147), 2019-11-22

DEHP (ug/g)

9000

6000

3000

1

7

14

Day

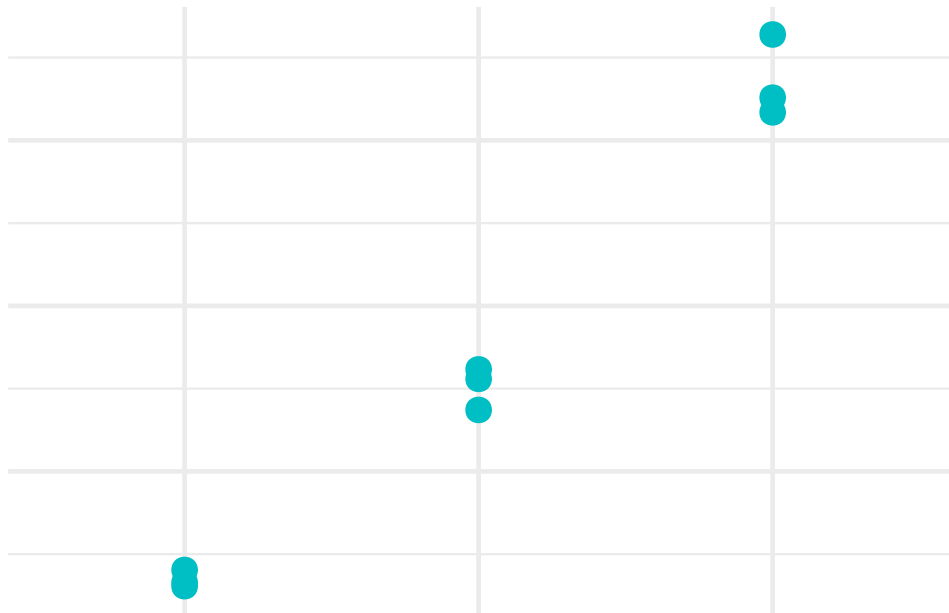

Supplement: Fig_S1_dehp_over_time.pdf [file Fig_S1_dehp_over_time.pdf]
